# Supplementary material
Source: PubMed Central journal article supplement (PMC3367523)
Supplement: cr201272x1.pdf [file cr201272x1.pdf]

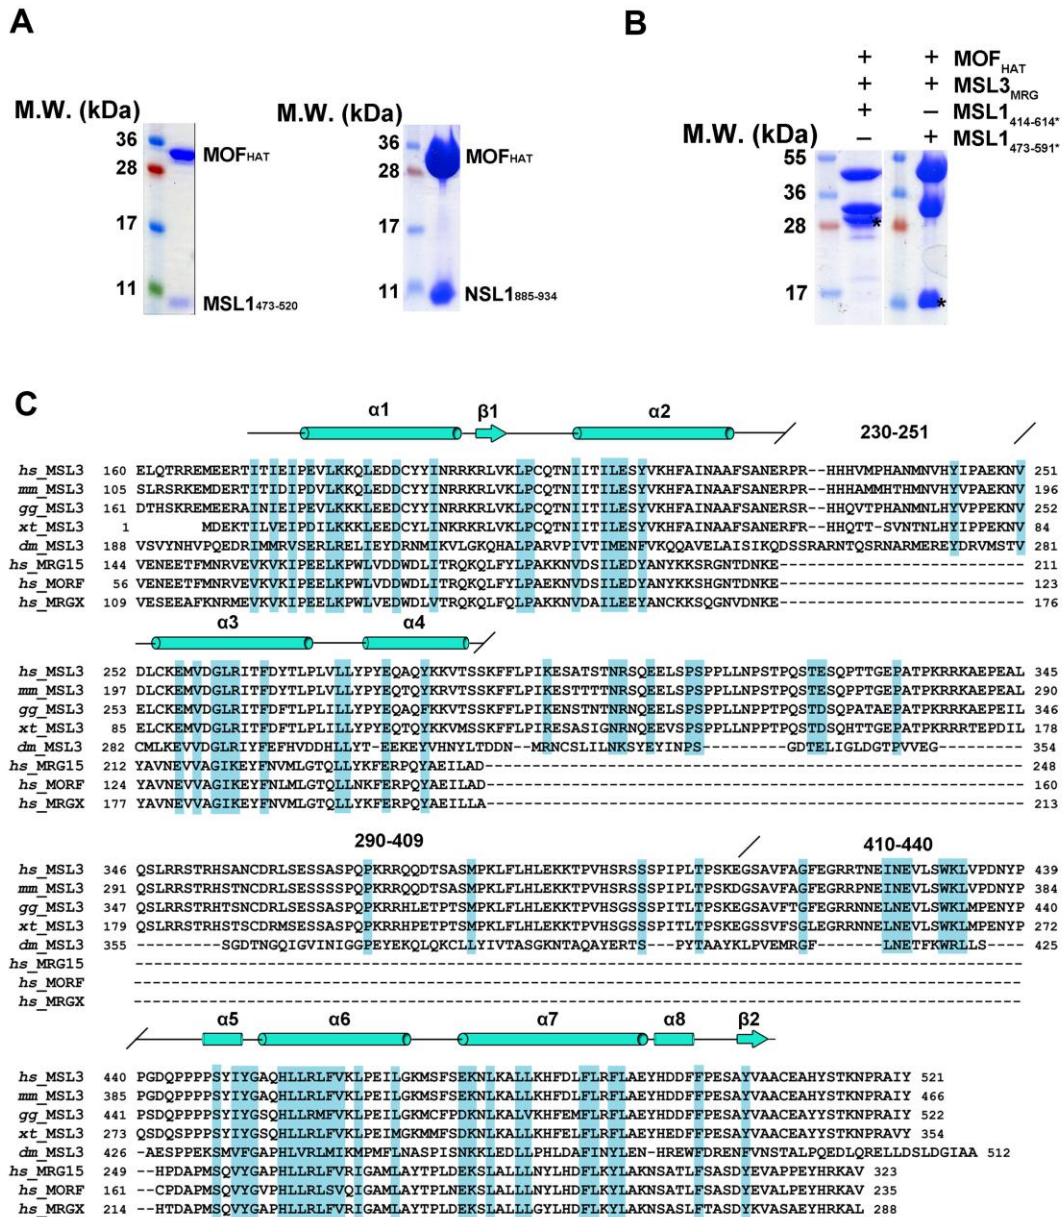

**Supplementary information, Figure S1 Biochemical delineation of the MSL and NSL complexes.** (A) SDS-PAGE of the protein complexes formed by MOF<sub>HAT</sub> with MSL1<sub>MBM</sub> or NSL1<sub>MBM</sub>. (B) SDS-PAGE of the MSL complexes composed of MOF<sub>HAT</sub>, MSL3<sub>MRG</sub> and different MSL1 fragments. (C) Sequence alignment of the MRG domains between MSL3 and the MRG family proteins. *hs*, *Homo sapiens*; *mm*, *Mus musculus*; *gg*, *Gallus gallus*; *xt*, *Xenopus tropicalis*; *dm*, *Drosophila melanogaster*. Secondary structures are shown as cylinders ( $\alpha$  helixes) and lines (loops), the MSL3-specific sequences are denoted by residue numbers, the identical residues are highlighted blue.
