# Supplementary material
Source: PubMed Central journal article supplement (PMC3367523)
Supplement: cr201272x2.pdf [file cr201272x2.pdf]

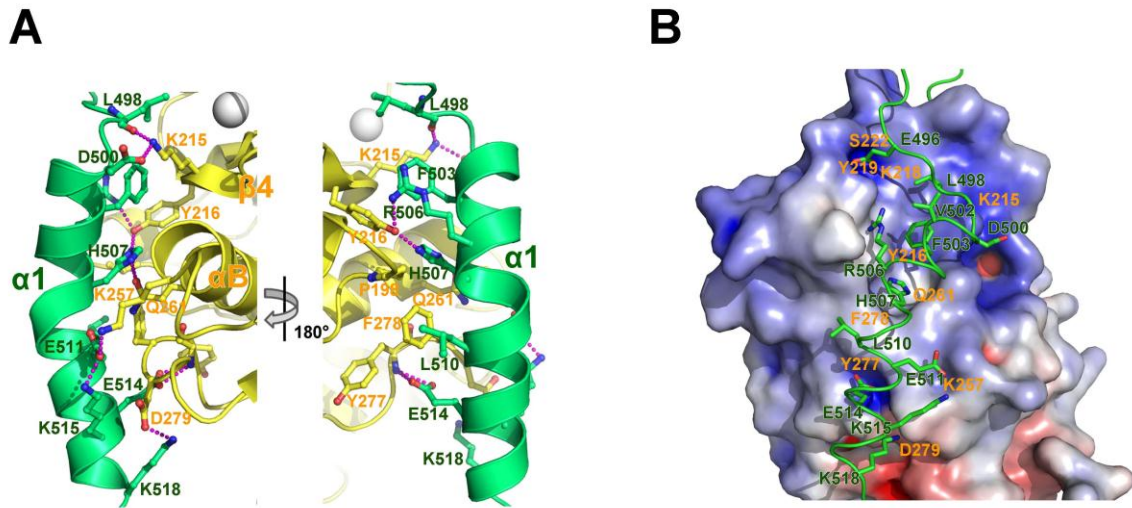

**Supplementary information, Figure S2** Detailed interactions between the C-terminal  $\alpha$ -helix of MSL1<sub>MBM</sub> and MOF<sub>HAT</sub>. **(A)** Cartoon representation of two views of the interaction interface between the  $\alpha$ -helix of MSL1<sub>MBM</sub> and MOF<sub>HAT</sub>. **(B)** Electrostatic surface potential representation of the MSL1-binding surface of MOF. Positive potential, blue; negative potential, red.
