# Supplementary material
Source: PubMed Central journal article supplement (PMC3367523)
Supplement: cr201272x4.pdf [file cr201272x4.pdf]

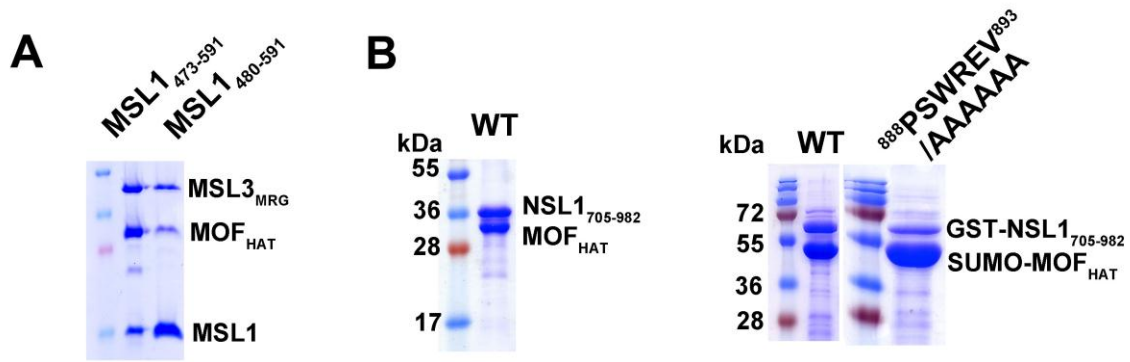

**Supplementary information, Figure S4** The  $\beta$ -strand module of MSL1<sub>MBM</sub> or NSL1<sub>MBM</sub> is important to forming a stable complex with MOF<sub>HAT</sub>. **(A)** The MSL1 or NSL1 fragments that interact with MOF are stable only when co-expressed and co-purified with MOF<sub>HAT</sub>. For the wild type MSL1, it remains in stable complex with MOF in a ratio of 1:1 after three steps of purifications; whereas for the MSL1 mutant with deletion of the  $\beta$ -strand module of MSL1<sub>MBM</sub>, due to the partial dissociation with MOF<sub>HAT</sub>, the amount of MSL1 is much more than that of MOF<sub>HAT</sub> after the second step of purifications. **(B)** Wild type NSL1 could form a stable complex with MOF in a ratio of 1:1; while for the NSL1 mutant with <sup>888</sup>PSWREV<sup>893</sup> replaced by AAAAAA, its affinity to MOF is weakened compared with that of the wild type NSL1 proteins in the first-step affinity purification with Ni-NTA agarose.
