# Supplementary material
Source: PubMed Central journal article supplement (PMC3367523)
Supplement: cr201272x5.pdf [file cr201272x5.pdf]

**Supplementary information, Table S1** Data collection and refinement statistics

|                                                         | MOF <sub>HAT</sub> -MSL1 <sub>MBM</sub> |
|---------------------------------------------------------|-----------------------------------------|
| <b>Data collection</b>                                  |                                         |
| Space group                                             | <i>P2</i> <sub>1</sub>                  |
| Cell dimensions                                         |                                         |
| - <i>a</i> , <i>b</i> , <i>c</i> (Å)                    | 64.801, 111.518, 66.751                 |
| - $\alpha$ , $\beta$ , $\gamma$ (°)                     | 90.00, 111.05, 90.00                    |
| Resolution (Å) (high-resolution shell)                  | 50-2.05 (2.12-2.05)                     |
| <i>R</i> <sub>merge</sub> (%) (high-resolution shell)   | 6.2 (30.6)                              |
| <i>I</i> / $\sigma$ (high-resolution shell)             | 21.52 (3.13)                            |
| Completeness (%) (high-resolution shell)                | 97.9 (87.1)                             |
| Redundancy (high-resolution shell)                      | 4.3 (3.1)                               |
| <b>Refinement</b>                                       |                                         |
| Resolution (Å)                                          | 50-2.05                                 |
| Number of reflections                                   | 54319                                   |
| <i>R</i> <sub>work</sub> / <i>R</i> <sub>free</sub> (%) | 20.82/24.82                             |
| Number of atoms                                         |                                         |
| -Proteins                                               | 5299                                    |
| -Water                                                  | 150                                     |
| -Zn                                                     | 2                                       |
| B-factors                                               |                                         |
| -protein                                                | 40.169                                  |
| -water                                                  | 34.783                                  |
| -Zn                                                     | 38.605                                  |
| Rms deviations                                          |                                         |
| -Bond lengths (Å)                                       | 0.009                                   |
| -Bond angles (°)                                        | 1.290                                   |
